# Supplementary material
Source: PubMed Central journal article supplement (PMC4538351)
Supplement: npp201585x1.pdf [file npp201585x1.pdf]

**Supplementary Table 1**

**Vehicle and TAM**

| Behavioral Test    | n (veh) | n (TAM) | Measurement           | Statistical Test | Comparison    | Statistic     | p value       | Figure |
|--------------------|---------|---------|-----------------------|------------------|---------------|---------------|---------------|--------|
| DG Total BrdU      | 5       | 5       | Total DG BrdU         | One-way ANOVA    | vehicle v TAM | F(1,8)=12.844 | <b>0.0071</b> | 1C     |
|                    |         |         | Dorsal DG Total BrdU  | One-way ANOVA    | vehicle v TAM | F(1,8)=16.595 | <b>0.0036</b> |        |
|                    |         |         | Ventral DG Total BrdU | One-way ANOVA    | vehicle v TAM | F(1,8)=8.968  | <b>0.0172</b> |        |
| BrdU/NeuN Colabel  | 3       | 3       | Total % BrdU+/NeuN    | One-way ANOVA    | vehicle v TAM | F(1,4)=0.515  | 0.5128        |        |
|                    |         |         | Dorsal % BrdU+/NeuN+  | One-way ANOVA    | vehicle v TAM | F(1,4)=0.083  | 0.7873        |        |
|                    |         |         | Ventral % BrdU+/NeuN+ | One-way ANOVA    | vehicle v TAM | F(1,4)=1.055  | 0.3623        |        |
| Hypothalamus BrdU  | 5       | 5       | Hypothalamus BrdU     | One-way ANOVA    | vehicle v TAM | F(1,8)=1.694  | 0.2293        | 1D     |
| Open Field         | 8       | 8       | Total Distance        | One-way ANOVA    | vehicle v TAM | F(1,14)=3.400 | 0.0865        | 1E     |
|                    |         |         | % Center Distance     | One-way ANOVA    | vehicle v TAM | F(1,14)=1.365 | 0.2622        | 1E     |
|                    |         |         | Center Distance       | One-way ANOVA    | vehicle v TAM | F(1,14)=0.388 | 0.5434        | S1A    |
|                    |         |         | Center Entries        | One-way ANOVA    | vehicle v TAM | F(1,14)=1.248 | 0.2827        |        |
|                    |         |         | Time in Center        | One-way ANOVA    | vehicle v TAM | F(1,14)=1.557 | 0.2326        |        |
| Elevated Plus Maze | 7       | 8       | Time in Open Arms     | One-way ANOVA    | vehicle v TAM | F(1,14)=0.876 | 0.3663        | 1F     |
|                    |         |         | Open Arm Entries      | One-way ANOVA    | vehicle v TAM | F(1,14)=0.403 | 0.5358        |        |
| Tail Suspension    | 8       | 8       | Total Mobility        | One-way ANOVA    | vehicle v TAM | F(1,14)=0.663 | 0.4292        | 1G     |
| Cort Levels        | 4       | 5       | Restraint 0           | One-way ANOVA    | vehicle v TAM | F(1,7)=0.113  | 0.7463        | 2      |
|                    | 8       | 7       | Restraint 30          | One-way ANOVA    | vehicle v TAM | F(1,13)=0.110 | 0.7452        |        |
|                    | 8       | 11      | Restraint 60          | One-way ANOVA    | vehicle v TAM | F(1,15)=2.153 | 0.163         |        |
|                    | 8       | 7       | Restraint 90          | One-way ANOVA    | vehicle v TAM | F(1,13)=1.539 | 0.2367        |        |
|                    | 7       | 7       | Novel Cage 15         | One-way ANOVA    | vehicle v TAM | F(1,12)=1.198 | 0.2952        |        |

**Vehicle, CORT and TAM+CORT**

| Behavioral Test       | n (veh)         | n (CORT)      | n (TAM+CORT) | Measurement       | Statistical Test | Comparison      | Statistic      | p value       | Figure |
|-----------------------|-----------------|---------------|--------------|-------------------|------------------|-----------------|----------------|---------------|--------|
| BrdU                  | 4               | 4             | 7            | Total BrdU        | One-way ANOVA    | vehicle v CORT  | F(1,6)=1.086   | 0.3376        | 3E     |
|                       |                 |               |              | Dorsal BrdU       | One-way ANOVA    | CORT v TAM+CORT | F(1,9)=5.330   | 0.0463        |        |
|                       |                 |               |              |                   | One-way ANOVA    | vehicle v CORT  | F(1,6)=1.212   | 0.3132        |        |
|                       |                 |               |              | Ventral BrdU      | One-way ANOVA    | CORT v TAM+CORT | F(1,9)=4.461   | 0.0638        |        |
|                       |                 |               |              |                   | One-way ANOVA    | vehicle v CORT  | F(1,6)=0.652   | 0.4501        |        |
|                       |                 |               |              | One-way ANOVA     | CORT v TAM+CORT  | F(1,9)=6.970    | <b>0.0269</b>  |               |        |
| BrdU/NeuN/MBP Colabel | 4               | 4             | 6            | Total %           | One-way ANOVA    | vehicle v CORT  | F(1,6)=1.423   | 0.278         | 3E     |
|                       |                 |               |              | BrdU+ / NeuN+     | One-way ANOVA    | CORT v TAM+CORT | F(1,8)=3.058   | 0.1185        |        |
|                       |                 |               |              | Dorsal %          | One-way ANOVA    | vehicle v CORT  | F(1,6)=0.157   | 0.7059        |        |
|                       |                 |               |              | BrdU+ / NeuN+     | One-way ANOVA    | CORT v TAM+CORT | F(1,8)=0.004   | 0.9524        |        |
|                       |                 |               |              | Ventral %         | One-way ANOVA    | vehicle v CORT  | F(1,6)=2.670   | 0.1534        |        |
|                       |                 |               |              | BrdU+/NeuN+       | One-way ANOVA    | CORT v TAM+CORT | F(1,8)=7.987   | <b>0.0223</b> |        |
| DCX                   | 4               | 5             | 7            | Total DCX         | One-way ANOVA    | vehicle v CORT  | F(1,7)=15.994  | <b>0.0052</b> | 3D     |
|                       |                 |               |              | 3' DCX            | One-way ANOVA    | CORT v TAM+CORT | F(1,10)=16.789 | <b>0.0022</b> |        |
|                       |                 |               |              |                   | One-way ANOVA    | vehicle v CORT  | F(1,7)=4.754   | 0.0656        |        |
|                       |                 |               |              | Dorsal DCX        | One-way ANOVA    | CORT v TAM+CORT | F(1,10)=18.025 | <b>0.0017</b> |        |
|                       |                 |               |              |                   | One-way ANOVA    | vehicle v CORT  | F(1,7)=4.387   | 0.0745        |        |
|                       |                 |               |              | Dorsal 3' DCX     | One-way ANOVA    | CORT v TAM+CORT | F(1,10)=6.627  | <b>0.0277</b> |        |
|                       |                 |               |              |                   | One-way ANOVA    | vehicle v CORT  | F(1,7)=3.188   | 0.1174        |        |
|                       |                 |               |              | Ventral DCX       | One-way ANOVA    | CORT v TAM+CORT | F(1,10)=9.085  | <b>0.013</b>  |        |
|                       |                 |               |              |                   | One-way ANOVA    | vehicle v CORT  | F(1,7)=6.393   | <b>0.0393</b> |        |
|                       |                 |               |              | Ventral 3' DCX    | One-way ANOVA    | CORT v TAM+CORT | F(1,10)=18.783 | <b>0.0015</b> |        |
|                       |                 |               |              |                   | One-way ANOVA    | vehicle v CORT  | F(1,7)=2.937   | 0.1303        |        |
|                       |                 |               |              | One-way ANOVA     | CORT v TAM+CORT  | F(1,10)=19.518  | <b>0.0013</b>  |               |        |
| Open Field            | 9               | 10            | 8            | Total Distance    | One-way ANOVA    | vehicle v CORT  | F(1,17)=1.162  | 0.2962        | 4B     |
|                       |                 |               |              | % Center Distance | One-way ANOVA    | CORT v TAM+CORT | F(1,16)=0.032  | 0.8606        |        |
|                       |                 |               |              |                   | One-way ANOVA    | vehicle v CORT  | F(1,17)=1.754  | 0.2029        |        |
|                       |                 |               |              | Center Distance   | One-way ANOVA    | CORT v TAM+CORT | F(1,16)=1.554  | 0.2305        |        |
|                       |                 |               |              |                   | One-way ANOVA    | vehicle v CORT  | F(1,17)=0.339  | 0.5699        |        |
|                       |                 |               |              | Center Entries    | One-way ANOVA    | CORT v TAM+CORT | F(1,16)=0.032  | 0.8606        |        |
|                       |                 |               |              |                   | One-way ANOVA    | vehicle v CORT  | F(1,17)=0.079  | 0.783         |        |
|                       |                 |               |              | Time in Center    | One-way ANOVA    | CORT v TAM+CORT | F(1,16)=0.056  | 0.816         |        |
| One-way ANOVA         | vehicle v CORT  | F(1,17)=0.037 | 0.8495       |                   |                  |                 |                |               |        |
| One-way ANOVA         | CORT v TAM+CORT | F(1,16)=0.011 | 0.9191       |                   |                  |                 |                |               |        |
| Elevated Plus Maze    | 12              | 15            | 15           | Time in Open Arms | One-way ANOVA    | vehicle v CORT  | F(1,25)=6.860  | <b>0.0148</b> | 4C     |
|                       |                 |               |              | One-way ANOVA     | CORT v TAM+CORT  | F(1,28)=6.273   | <b>0.0184</b>  |               |        |
|                       |                 |               |              | Open Arm Entries  | One-way ANOVA    | vehicle v CORT  | F(1,25)=6.537  | <b>0.017</b>  |        |
|                       |                 |               |              | One-way ANOVA     | CORT v TAM+CORT  | F(1,28)=4.252   | <b>0.0486</b>  |               |        |
| Tail Suspension Test  | 14              | 15            | 14           | Total Mobility    | One-way ANOVA    | vehicle v CORT  | F(1,26)=5.130  | <b>0.0321</b> | 4D     |
|                       |                 |               |              | One-way ANOVA     | CORT v TAM+CORT  | F(1,26)=9.597   | <b>0.0046</b>  |               |        |
| Cort Levels           | 5               | 5             | 6            | Plasma CORT       | One-way ANOVA    | vehicle v CORT  | F(1,8)=5.155   | 0.0528        | 4E     |
|                       |                 |               |              | One-way ANOVA     | CORT v TAM+CORT  | F(1,9)=0.016    | 0.9029         |               |        |

**Normalized data**

| Behavioral Test            | Measurement        | Statistical Test       | Comparison             | Statistic      | p value       | Figure |
|----------------------------|--------------------|------------------------|------------------------|----------------|---------------|--------|
| Open Field                 | % Center Distance  | 2-way ANOVA            | Factor 1- CORT         | F(1,39)=0.857  | 0.3602        | S4A    |
|                            |                    |                        | Factor 2- TAM          | F(1,39)=2.147  | 0.1509        |        |
|                            |                    |                        | CORT x TAM interaction | F(1,39)=0.007  | 0.9319        |        |
|                            | Total Distance     | 2-way ANOVA            | Factor 1- CORT         | F(1,39)=4.773  | <b>0.035</b>  |        |
|                            |                    |                        | Factor 2- TAM          | F(1,39)=0.891  | 0.3509        |        |
|                            |                    |                        | CORT x TAM interaction | F(1,39)=1.311  | 0.2592        |        |
|                            |                    | PLSD Post-hoc test     | vehicle v CORT         |                | 0.4093        |        |
|                            |                    |                        | vehicle v TAM          |                | 0.1274        |        |
|                            |                    |                        | CORT v TAM+CORT        |                | 0.893         |        |
|                            | Center Distance    | 2-way ANOVA            | Factor 1- CORT         | F(1,39)=4.854  | <b>0.0336</b> |        |
|                            |                    |                        | Factor 2- TAM          | F(1,39)=1.356  | 0.2512        |        |
|                            |                    |                        | CORT x TAM interaction | F(1,39)=0.523  | 0.4737        |        |
|                            |                    | PLSD Post-hoc test     | vehicle v CORT         |                | 0.2424        |        |
|                            |                    |                        | vehicle v TAM          |                | 0.1671        |        |
|                            |                    |                        | CORT v TAM+CORT        |                | 0.7678        |        |
|                            | Center Entries     | 2-way ANOVA            | Factor 1- CORT         | F(1,39)=7.537  | <b>0.0091</b> |        |
|                            |                    |                        | Factor 2- TAM          | F(1,39)=0.155  | 0.6957        |        |
|                            |                    |                        | CORT x TAM interaction | F(1,39)=0.375  | 0.5436        |        |
|                            |                    | PLSD Post-hoc test     | vehicle v CORT         |                | 0.0951        |        |
|                            |                    |                        | vehicle v TAM          |                | 0.4573        |        |
|                            |                    |                        | CORT v TAM+CORT        |                | 0.8836        |        |
| Time in Center             | 2-way ANOVA        | Factor 1- CORT         | F(1,39)=9.261          | <b>0.0042</b>  |               |        |
|                            |                    | Factor 2- TAM          | F(1,39)=0.984          | 0.3273         |               |        |
|                            |                    | CORT x TAM interaction | F(1,39)=0.789          | 0.3798         |               |        |
|                            | PLSD Post-hoc test | vehicle v CORT         |                        | 0.0918         |               |        |
|                            |                    | vehicle v TAM          |                        | 0.1688         |               |        |
|                            |                    | CORT v TAM+CORT        |                        | 0.9446         |               |        |
| Elevated Plus Maze         | Time in Open Arms  | 2-way ANOVA            | Factor 1- CORT         | F(1,54)=0.648  | 0.4245        | S4B    |
|                            |                    |                        | Factor 2- TAM          | F(1,54)=0.595  | 0.444         |        |
|                            |                    |                        | CORT x TAM interaction | F(1,54)=7.402  | <b>0.0087</b> |        |
|                            |                    | PLSD Post-hoc test     | vehicle v CORT         |                | <b>0.0059</b> |        |
|                            |                    |                        | vehicle v TAM          |                | 0.2012        |        |
|                            |                    |                        | CORT v TAM+CORT        |                | <b>0.0104</b> |        |
|                            | Open Arm Entries   | 2-way ANOVA            | Factor 1- CORT         | F(1,54)=0.300  | 0.586         |        |
|                            |                    |                        | Factor 2- TAM          | F(1,54)2.158   | 0.1477        |        |
|                            |                    |                        | CORT x TAM interaction | F(1,54)6.335   | <b>0.0148</b> |        |
|                            |                    | PLSD Post-hoc test     | vehicle v CORT         |                | <b>0.0148</b> |        |
|                            |                    |                        | vehicle v TAM          |                | 0.5035        |        |
|                            |                    |                        | CORT v TAM+CORT        |                | <b>0.0294</b> |        |
| Tail Suspension Test       | Total Mobility     | 2-way ANOVA            | Factor 1- CORT         | F(1,53)=0.119  | 0.7316        | S4C    |
|                            |                    |                        | Factor 2- TAM          | F(1,53)=4.319  | <b>0.0425</b> |        |
|                            |                    |                        | CORT x TAM interaction | F(1,53)=8.896  | <b>0.0043</b> |        |
|                            |                    | PLSD Post-hoc test     | vehicle v CORT         |                | <b>0.0082</b> |        |
|                            |                    |                        | vehicle v TAM          |                | 0.539         |        |
|                            |                    |                        | CORT v TAM+CORT        |                | <b>0.0005</b> |        |
| Forced Swim Test           | Total Mobility     | 2-way ANOVA            | Factor 1- CORT         | F(1,35)=1.847  | 0.1828        | S4D    |
|                            |                    |                        | Factor 2- TAM          | F(1,35)=0.153  | 0.6979        |        |
|                            |                    |                        | CORT x TAM interaction | F(1,35)=0.01   | 0.9212        |        |
| Novelty Suppressed Feeding | Latency to Feed    | 2-way ANOVA            | Factor 1- CORT         | F(1,52)=0.0001 | 0.994         | S4E    |
|                            |                    |                        | Factor 2- TAM          | F(1,52)=0.008  | 0.9309        |        |
|                            |                    |                        | CORT x TAM interaction | F(1,52)=0.623  | 0.4334        |        |

**Normalized data (continued)**

| Behavioral Test          | Measurement                | Statistical Test   | Comparison             | Statistic      | p value       | Figure |
|--------------------------|----------------------------|--------------------|------------------------|----------------|---------------|--------|
| BrdU                     | Total BrdU                 | 2-way ANOVA        | Factor 1- CORT         | F(1,21)=8.889  | <b>0.0071</b> | S4G    |
|                          |                            |                    | Factor 2- TAM          | F(1,21)=12.972 | <b>0.0017</b> |        |
|                          |                            |                    | CORT x TAM interaction | F(1,21)=2.283  | 0.1457        |        |
|                          |                            | PLSD Post-hoc test | vehicle v CORT         |                | 0.3163        |        |
|                          |                            |                    | vehicle v TAM          |                | 0.1308        |        |
|                          |                            |                    | CORT v TAM+CORT        |                | <b>0.0026</b> |        |
| BrdU/NeuN/MBP<br>Colabel | Dorsal %<br>BrdU+ / NeuN+  | 2-way ANOVA        | Factor 1- CORT         | F(1,16)=0.390  | 0.5413        | S4H    |
|                          |                            |                    | Factor 2- TAM          | F(1,16)=0.016  | 0.902         |        |
|                          |                            |                    | CORT x TAM interaction | F(1,16)=0.043  | 0.8381        |        |
|                          | Ventral %<br>BrdU+ / NeuN+ | 2-way ANOVA        | Factor 1- CORT         | F(1,16)=4.856  | <b>0.0425</b> |        |
|                          |                            |                    | Factor 2- TAM          | F(1,16)=10.254 | <b>0.0056</b> |        |
|                          |                            |                    | CORT x TAM interaction | F(1,16)=3.235  | 0.091         |        |
|                          |                            | PLSD Post-hoc test | vehicle v CORT         |                | <b>0.0082</b> |        |
|                          |                            |                    | vehicle v TAM          |                | 0.3509        |        |
|                          |                            |                    | CORT v TAM+CORT        |                | <b>0.0021</b> |        |
