# Supplementary material
Source: PubMed Central journal article supplement (PMC4538351)
Supplement: npp201585x3.pdf [file npp201585x3.pdf]

### Supplemental Figure Legend:

**Figure S1: Combined and normalized data for no stress and CORT treated *iBax* mice.** This figure represents normalized and combined data from Figures 1, 3, and 4 as described in the Materials and Methods section. (a) In open field measurements, there were main effects of CORT by Two-way ANOVA on normalized total distance ( $F(1,39)=4.773$ ;  $p<0.05$ ), normalized center distance ( $F(1,39)=4.854$ ,  $p<0.05$ ), normalized center entries ( $F(1,39)=7.537$ ,  $p<0.01$ ) and normalized time in center ( $F(1,39)=9.261$ ,  $p<0.01$ ), but post-hoc tests revealed no significant differences between vehicle and CORT, vehicle and TAM, or CORT and TAM+CORT groups. (b) In the elevated plus maze, two-way ANOVA revealed a CORT x TAM interaction for time spent in open arms ( $F(1,54)=0.595$ ,  $p<0.01$ ), and post-hoc analysis revealed significant differences between vehicle and CORT groups ( $p<0.01$ ) and CORT and TAM+CORT groups ( $p<0.05$ ). For open arm entries, there was also a significant CORT x TAM interaction ( $F(1,54)=6.335$ ,  $p<0.05$ ), as well as significant differences between vehicle and CORT groups ( $p<0.05$ ), and CORT and TAM+CORT groups ( $P<0.05$ ). (c) In the tail suspension test, two-way ANOVA revealed a significant main effect of TAM ( $F(1,53)=4.319$ ,  $p<0.05$ ), as well as a significant CORT x TAM interaction ( $F(1,53)=8.896$ ,  $p<0.001$ ). Post-hoc analyses revealed significant differences between vehicle and CORT groups ( $p<0.01$ ), as well as CORT and TAM+CORT groups ( $p<0.001$ ). (d) Two-way ANOVA revealed no significant effects in the forced swim test, (e) nor in the novelty suppressed feeding test. Survival plot displays cumulative survival. (f) Two-way ANOVA revealed main effects of both CORT ( $F(1,21)=8.889$ ,  $p<0.001$ ) and TAM ( $F(1,21)=12.972$ ,  $p<0.001$ ) for total number of BrdU-positive cells in the dentate gyrus. Post-hoc analysis revealed a

significant difference between CORT and TAM+CORT groups ( $p < 0.001$ ). (h) In the dorsal hippocampus, two-way ANOVA revealed no differences between groups for the ratios of cell types colabeled with BrdU. However, in the ventral hippocampus, two-way ANOVA revealed significant main effects of CORT ( $F(1,16)=4.856$ ,  $p < 0.05$ ) and TAM ( $F(1,16)=10.254$ ,  $p < 0.01$ ) for the percent of BrdU-positive cells colabeled with NeuN, and post-hoc analysis revealed significant differences between vehicle and CORT ( $p < 0.01$ ), as well as between CORT and TAM+CORT groups ( $p < 0.01$ ). Error bars represent SEM. \* $p < 0.05$ , \*\*  $p < 0.01$ .
